# Supplementary material
Source: Springer Nature journal article supplement (https://www.springermedizin.de/resource/supplementary/12986_2009_246_MOESM1_ESM.pdf/25655672)

# Serum macrophage inhibitory cytokine-1 in anorexia nervosa

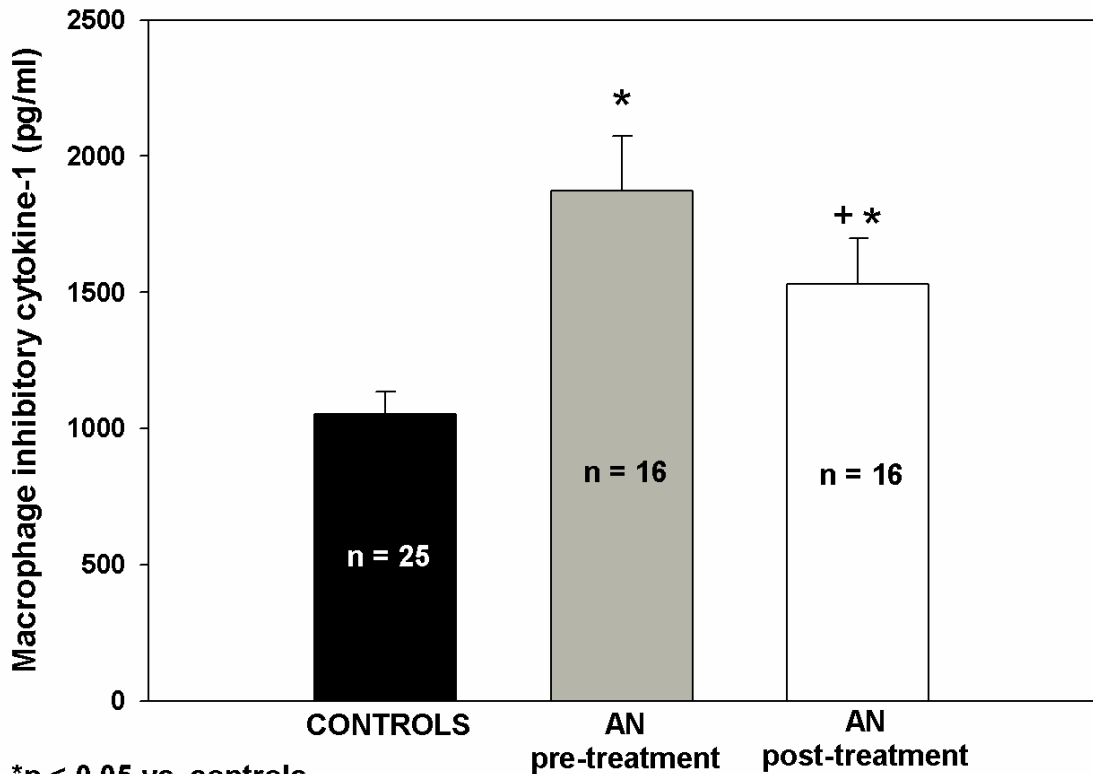

\*  $p < 0.05$  vs. controls

+  $p < 0.05$  vs. pre-treatment

Supplement: MOESM1 [file 25655672]
